# Supplementary material for: RNF213 Variants, Vasospastic Angina, and Risk of Fatal Myocardial Infarction
Source: PubMed Central journal article supplement (PMC11195602; doi:10.1001/jamacardio.2024.1483), 2024-06-18
Supplement: jamacardiol-e241483-s002.pdf [file jamacardiol-e241483-s002.pdf]

## Supplemental Online Content: Nonauthor Collaborators

\*First name, last name, and suffix (if applicable) are required and will appear in PubMed.

| <b>*Group Name(s): The Biobank Japan Project</b> |                   |                              |                         |                                                                              |                                                 |                                                                |                                                                                                   |
|--------------------------------------------------|-------------------|------------------------------|-------------------------|------------------------------------------------------------------------------|-------------------------------------------------|----------------------------------------------------------------|---------------------------------------------------------------------------------------------------|
| <b>*First Name and Middle Initial(s)</b>         | <b>*Last Name</b> | <b>*Suffix (eg, Jr, III)</b> | <b>Academic Degrees</b> | <b>Institution</b>                                                           | <b>Location (city, state/province, country)</b> | <b>Role or Contribution, eg, chair, principal investigator</b> | <b>Group (if more than 1 Group listed in the byline) and/or Subgroup (eg, Steering Committee)</b> |
| Yuji                                             | Yamanashi         |                              | PhD                     | The University of Tokyo                                                      | Tokyo, Japan                                    | Member                                                         | BioBank Japan Project Consortium                                                                  |
| Yoichi                                           | Furukawa          |                              | PhD                     | The University of Tokyo                                                      | Tokyo, Japan                                    | Member                                                         | BioBank Japan Project Consortium                                                                  |
| Yoshinori                                        | Murakami          |                              | PhD                     | The University of Tokyo                                                      | Tokyo, Japan                                    | Member                                                         | BioBank Japan Project Consortium                                                                  |
| Kaori                                            | Muto              |                              | PhD                     | The University of Tokyo                                                      | Tokyo, Japan                                    | Member                                                         | BioBank Japan Project Consortium                                                                  |
| Akiko                                            | Nagai             |                              | PhD                     | The University of Tokyo                                                      | Tokyo, Japan                                    | Member                                                         | BioBank Japan Project Consortium                                                                  |
| Wataru                                           | Obara             |                              | PhD                     | Iwate Medical University                                                     | Iwate, Japan                                    | Member                                                         | BioBank Japan Project Consortium                                                                  |
| Ken                                              | Yamaji            |                              | PhD                     | Juntendo University Graduate School of Medicine                              | Tokyo, Japan                                    | Member                                                         | BioBank Japan Project Consortium                                                                  |
| Kazuhisa                                         | Takahashi         |                              | PhD                     | Juntendo University Graduate School of Medicine                              | Tokyo, Japan                                    | Member                                                         | BioBank Japan Project Consortium                                                                  |
| Satoshi                                          | Asai              |                              | PhD                     | Nihon University                                                             | Tokyo, Japan                                    | Member                                                         | BioBank Japan Project Consortium                                                                  |
| Yasuo                                            | Takahashi         |                              | PhD                     | Nihon University                                                             | Tokyo, Japan                                    | Member                                                         | BioBank Japan Project Consortium                                                                  |
| Takao                                            | Suzuki            |                              | PhD                     | Tokushukai Group                                                             | Tokyo, Japan                                    | Member                                                         | BioBank Japan Project Consortium                                                                  |
| Nobuaki                                          | Sinozaki          |                              | PhD                     | Tokushukai Group                                                             | Tokyo, Japan                                    | Member                                                         | BioBank Japan Project Consortium                                                                  |
| Hiroki                                           | Yamaguchi         |                              | PhD                     | Nippon Medical School                                                        | Tokyo, Japan                                    | Member                                                         | BioBank Japan Project Consortium                                                                  |
| Shiro                                            | Minami            |                              | PhD                     | Nippon Medical School                                                        | Tokyo, Japan                                    | Member                                                         | BioBank Japan Project Consortium                                                                  |
| Shigeo                                           | Murayama          |                              | PhD                     | Tokyo Metropolitan Geriatric Hospital and Institute of Gerontology           | Tokyo, Japan                                    | Member                                                         | BioBank Japan Project Consortium                                                                  |
| Kozo                                             | Yoshimori         |                              | PhD                     | Fukujuji Hospital                                                            | Tokyo, Japan                                    | Member                                                         | BioBank Japan Project Consortium                                                                  |
| Satoshi                                          | Nagayama          |                              | PhD                     | The Cancer Institute Hospital of the Japanese Foundation for Cancer Research | Tokyo, Japan                                    | Member                                                         | BioBank Japan Project Consortium                                                                  |
| Daisuke                                          | Obata             |                              | PhD                     | Shiga University of Medical Science                                          | Shiga, Japan                                    | Member                                                         | BioBank Japan Project Consortium                                                                  |

Supplemental Online Content: Nonauthor Collaborators

\*First name, last name, and suffix (if applicable) are required and will appear in PubMed.

| <b>*First Name and Middle Initial(s)</b> | <b>*Last Name</b> | <b>*Suffix (eg, Jr, III)</b> | <b>Academic Degrees</b> | <b>Institution</b>                                        | <b>Location (city, state/province, country)</b> | <b>Role or Contribution, eg, chair, principal investigator</b> | <b>Group (if more than 1 Group listed in the byline) and/or Subgroup (eg, Steering Committee)</b> |
|------------------------------------------|-------------------|------------------------------|-------------------------|-----------------------------------------------------------|-------------------------------------------------|----------------------------------------------------------------|---------------------------------------------------------------------------------------------------|
| Masahiko                                 | Higashiyama       |                              | PhD                     | Osaka International Cancer Institute                      | Osaka, Japan                                    | Member                                                         | BioBank Japan Project Consortium                                                                  |
| Akihide                                  | Matsumoto         |                              | PhD                     | IIZUKA HOSPITAL                                           | Fukuoka, Japan                                  | Member                                                         | BioBank Japan Project Consortium                                                                  |
| Yukihiro                                 | Koretsune         |                              | PhD                     | National Hospital Organization<br>Osaka National Hospital | Osaka, Japan                                    | Member                                                         | BioBank Japan Project Consortium                                                                  |
