# Supplementary material for: RNF213 Variants, Vasospastic Angina, and Risk of Fatal Myocardial Infarction
Source: PubMed Central journal article supplement (PMC11195602; doi:10.1001/jamacardio.2024.1483), 2024-06-18
Supplement: jamacardiol-e241483-s003.pdf [file jamacardiol-e241483-s003.pdf]

## Data Sharing Statement

Hikino. RNF213 Variants, Vasospastic Angina, and Risk of Fatal Myocardial Infarction. *JAMA Cardiol.* Published June 18, 2024. doi:10.1001/jamacardio.2024.1483

### Data

**Data available:** Yes

**Data types:** Other (please specify)

**Additional Information:** summary statistics

**How to access data:** The full GWAS results can be accessed through the website of the Japanese ENcyclopedia of GENetic Associations by Riken (JENGER, <http://jenger.riken.jp/en/>).

**When available:** With publication

### Supporting Documents

**Document types:** None

### Additional Information

**Who can access the data:** Researchers whose proposed use of the data has been approved

**Types of analyses:** For any purpose

**Mechanisms of data availability:** With investigator support
